# Supplementary material
Source: HighWire-hosted journal article supplement (https://jnm.snmjournals.org/highwire/filestream/103704/field_highwire_adjunct_files/0/258467_Supplemental_Data.pdf)
Supplement: 258467_Supplemental_Data.pdf [file 258467_Supplemental_Data.pdf]

<sup>68</sup>Ga-DOTA-FAPI-04 PET/MR in the evaluation of gastric carcinomas: comparison with <sup>18</sup>F-FDG PET/CT

SUPPLEMENTAL TABLE 1. Positive findings revealed by <sup>18</sup>F-FDG PET and <sup>68</sup>Ga-FAPI PET (+, positive; -, negative)

| Patient No. | Primary tumor |      | Peritoneal metastases |      | Lymph nodes (abdominal) |      | Ovaries |      | Liver metastases |      | Bone metastases |      | Lymph nodes (supradiaphragm) |      | Other tissues |      |
|-------------|---------------|------|-----------------------|------|-------------------------|------|---------|------|------------------|------|-----------------|------|------------------------------|------|---------------|------|
|             | FDG           | FAPI | FDG                   | FAPI | FDG                     | FAPI | FDG     | FAPI | FDG              | FAPI | FDG             | FAPI | FDG                          | FAPI | FDG           | FAPI |
| 1           | +             | +    | -                     | +    | -                       | -    | +       | +    | -                | -    | -               | -    | -                            | +    | -             | -    |
| 2           | +             | +    | +                     | +    | +                       | +    | +       | +    | -                | -    | -               | -    | +                            | +    | -             | -    |
| 3           | +             | +    | -                     | -    | +                       | +    | -       | -    | +                | +    | +               | +    | -                            | -    | -             | -    |
| 4           | -             | +    | -                     | -    | +                       | +    | -       | -    | +                | +    | -               | -    | -                            | -    | -             | -    |
| 5&          | -             | +    | -                     | -    | -                       | -    | -       | -    | -                | -    | -               | -    | +                            | -    | -             | -    |
| 6&§         | -             | +    | -                     | +    | -                       | +    | -       | -    | -                | -    | -               | -    | -                            | -    | -             | -    |
| 7           | +             | +    | -                     | -    | +                       | +    | -       | -    | +                | +    | -               | -    | +                            | +    | -             | +    |
| 8           | +             | +    | +                     | +    | -                       | -    | -       | -    | -                | -    | -               | -    | +                            | +    | -             | -    |
| 9           | +             | +    | -                     | -    | +                       | +    | -       | -    | -                | -    | +               | +    | -                            | -    | -             | -    |
| 10          | +             | +    | +                     | +    | +                       | +    | -       | -    | -                | -    | +               | +    | -                            | -    | -             | -    |
| 11          | +             | +    | -                     | -    | +                       | +    | -       | -    | -                | -    | -               | -    | +                            | +    | -             | -    |
| 12&         | +             | +    | -                     | -    | -                       | -    | +       | +    | -                | -    | -               | -    | -                            | -    | -             | -    |
| 13          | -             | +    | -                     | -    | -                       | -    | -       | -    | -                | -    | -               | -    | -                            | -    | -             | -    |
| 14§         | +             | +    | -                     | +    | -                       | +    | -       | -    | -                | -    | -               | -    | -                            | -    | -             | -    |
| 15          |               |      | -                     | +    | -                       | -    | +       | +    | -                | -    | -               | -    | -                            | -    | -             | -    |
| 16          |               |      | -                     | +    | +                       | +    | +       | +    | -                | -    | -               | -    | +                            | +    | -             | +    |
| 17          |               |      | +                     | +    | -                       | -    | +       | +    | -                | -    | -               | -    | -                            | -    | -             | -    |
| 18          |               |      | -                     | +    | -                       | -    | +       | +    | -                | -    | -               | -    | -                            | -    | -             | -    |
| 19          |               |      | -                     | -    | +                       | +    | -       | -    | -                | -    | -               | -    | -                            | -    | -             | -    |
| 20          |               |      | -                     | -    | +                       | +    | -       | -    | -                | -    | -               | -    | -                            | -    | +             | +    |
| Total + No. | 10            | 14   | 4                     | 10   | 10                      | 12   | 7       | 7    | 3                | 3    | 3               | 3    | 6                            | 6    | 1             | 3    |

& False negative abdominal lymph nodes in patient 5 (metastatic LN number/total dissected LN number: 5/50), patient 6 (9/24, only 1 LN was positive on <sup>68</sup>Ga-FAPI PET), patient 12 (19/25). § <sup>68</sup>Ga-FAPI PET leads to upstage to stage IV in patient 6 and 14.
